# Supplementary material for: Association of Spinal Cord Stimulator Implantation With Persistent Opioid Use in Patients With Postlaminectomy Syndrome
Source: PubMed Central journal article supplement (PMC8804916; doi:10.1001/jamanetworkopen.2021.45876), 2022-01-31
Supplement: jamanetwopen-e2145876-s001.pdf [file jamanetwopen-e2145876-s001.pdf]

## Supplemental Online Content

Vu TN, Khunsriraksakul C, Vorobeychik Y, et al. Association of spinal cord stimulator implantation with persistent opioid use in patients with postlaminectomy syndrome. *JAMA Netw Open*. 2022;5(1):e2145876. doi:10.1001/jamanetworkopen.2021.45876

**eTable 1.** A List of ICD and CPT Codes Used to Extract Post-Laminectomy Syndrome Diagnosis, Spine Surgery Procedure, Spinal Cord Stimulation Device, and Other Relevant Clinical Diagnoses

**eTable 2.** List of Opioid and Psychotropic Medications Used With RxNorm Codes Included in Parentheses

**eTable 3.** List of ICD-9/10 Codes Used to Calculate Charlson Comorbidity Index Score

**eTable 4.** Characteristics of Post-Laminectomy Syndrome Patients in Diamond Network Stratified by SCS Status

**eTable 5.** Propensity Score Matching Analysis With Average Treatment Effect (ATE) Defined by Odds Ratios

**eFigure 1.** Flowchart Illustrating the Inclusion and Exclusion Criteria of Postlaminectomy Syndrome Patients With and Without Spinal SCS

**eFigure 2.** Multivariable Analysis Showing Factors Associated With Receiving an SCS Implant in PLS Patients

**eFigure 3.** Breakdown of PLS Cohort by SCS Status, Baseline Opioid Status, and Opioid Use Status at 3-15 Months After Adjusted Index Date (for Patients Without SCS) or SCS Implant in Diamond Network

**eFigure 4.** Multivariable Analysis With Sensitivity Analyses Showing Factors Associated With New COT in Opioid-Naïve Patients (Left Panel) and Persistent COT in Chronic Opioid Users (Right Panel) 3-15 Months After Adjusted Index Date (for Patients Without SCS) or SCS Implant in Diamond Network

This supplemental material has been provided by the authors to give readers additional information about their work.

**eTable 1:** A list of ICD and CPT codes used to extract post-laminectomy syndrome diagnosis, spine surgery procedure, spinal cord stimulation device, and other relevant clinical diagnoses.

| Diagnosis                          | ICD-9 codes                                                                                        | ICD-10 codes                                                                   | CPT codes                                                     | RxNorms                               |
|------------------------------------|----------------------------------------------------------------------------------------------------|--------------------------------------------------------------------------------|---------------------------------------------------------------|---------------------------------------|
| <b>Main</b>                        |                                                                                                    |                                                                                |                                                               |                                       |
| Post-laminectomy syndrome          | 722.80-722.83                                                                                      | M96.1                                                                          | -                                                             | -                                     |
| Spine surgery                      | -                                                                                                  | -                                                                              | 22010-22899                                                   | -                                     |
| Spinal cord stimulation            | -                                                                                                  | -                                                                              | 63655, 63663, 63664, 63685                                    | -                                     |
| <b>Psychosocial history</b>        |                                                                                                    |                                                                                |                                                               |                                       |
| Smoking                            | 305.1, 649.0, 989.84, V15.82                                                                       | F17, O99.33, T65.22, Z71.6, Z72.0, Z87.891                                     | 99406, 99407, G0436, G0437, G9016, S9453, S4995, G9276, G9458 | Nicotine (7407), Varenicline (591622) |
| Alcohol abuse                      | 94.46, 94.53, 94.6, 265.2, 291, 303, 305.0, 357.5, 425.5, 535.3, 571.0-571.3, 760.71, 980.0, V11.3 | E52, F10, G62.1, G72.1, I42.6, K29.2, K70, K85.2, K86.0, O99.31, T51.0X, Z71.4 | -                                                             | -                                     |
| Non-alcohol substance use disorder | 292, 304, 305.2-305.9, V65.42                                                                      | F11-F19                                                                        | -                                                             | -                                     |
| Depression diagnosis               | 296.2, 296.3, 296.5, 300.4, 309, 311                                                               | F31-F33, F34.1, F43                                                            | -                                                             | -                                     |
| Anxiety diagnosis                  | 300.0, 300.2                                                                                       | F40-F41                                                                        | -                                                             | -                                     |
| Psychosis diagnosis                | 293.8, 295, 296.04, 296.14, 296.44, 296.54, 297, 298                                               | F06, F20, F22-F25, F28-F29, F30.2, F31.2, F31.5, F32.3, F33.3, F44.89          | -                                                             | -                                     |

Abbreviations: ICD-9/10 = International Classification of Diseases, Ninth/Tenth Revision. CPT = Current Procedural Terminology.

**eTable 2:** List of opioid and psychotropic medications used with RxNorm codes included in parentheses.

| <b>Opioids</b>         |                                                                                                                                                                                                                                                                        |
|------------------------|------------------------------------------------------------------------------------------------------------------------------------------------------------------------------------------------------------------------------------------------------------------------|
|                        | Hydromorphone (3423), Hydrocodone (5489), Fentanyl (4337), Morphine (7052), Oxycodone (7804), Oxymorphone (7814)                                                                                                                                                       |
|                        | <b>Exclude:</b> Hydromorphone (3423) records with Guaifenesin (5032)<br><b>Exclude:</b> Hydrocodone (5489) records with Guaifenesin (5032), Pseudoephedrine (8896), Homatropine (27084), Chlorpheniramine (2400)                                                       |
| <b>Benzodiazepines</b> |                                                                                                                                                                                                                                                                        |
|                        | Alprazolam (596), Chlordiazepoxide (2356), Clonazepam (2598), Clorazepate (2353), Diazepam (3322), Estazolam (4077), Flurazepam (4501), Halazepam (26412), Lorazepam (6470), Midazolam (6960), Oxazepam (7781), Quazepam (35185), Temazepam (10355), Triazolam (10767) |
| <b>Antidepressants</b> |                                                                                                                                                                                                                                                                        |
| SSRI                   | Citalopram (2556), Escitalopram (321988), Paroxetine (32937), Fluoxetine (4493), Fluvoxamine (42355), Sertraline (36437)                                                                                                                                               |
| SNRI                   | Desvenlafaxine (734064), Duloxetine (72625), Levomilnacipran (1433212), Milnacipran (588250), Venlafaxine (39786)                                                                                                                                                      |
| SMS                    | Vilazodone (1086769), Vortioxetine (1455099)                                                                                                                                                                                                                           |
| SARI                   | Trazodone (10737), Nefazodone (31565)                                                                                                                                                                                                                                  |
| TCA                    | Amitriptyline (704), Clomipramine (2597), Desipramine (3247), Imipramine (5691), Nortriptyline (7531), Protriptyline (8886), Trimipramine (10834)                                                                                                                      |
| TeCA                   | Amoxapine (722), Maprotiline (6646), Mirtazapine (15996)                                                                                                                                                                                                               |
| MAOI                   | Isocarboxazid (6011), Phenelzine (8123), Tranylcypromine (10734), Selegiline (9639)                                                                                                                                                                                    |
| <b>Antipsychotics</b>  |                                                                                                                                                                                                                                                                        |
| Typical                | Chlorpromazine (2403), Thioridazine (10502), Mesoridazine (6779), Loxapine (6475), Molindone (7019), Perphenazine (8076), Thiothixene (10510), Trifluoperazine (10800), Haloperidol (5093), Fluphenazine (4496), Droperidol (3648), Prochlorperazine (8704)            |
| Atypical               | Aripiprazole (89013), Asenapine (784649), Clozapine (2626), Iloperidone (73178), Lurasidone (1040028), Olanzapine (61381), Paliperidone (679314), Quetiapine (51272), Risperidone (35636), Ziprasidone (115698)                                                        |

Abbreviations: SSRI = selective serotonin reuptake inhibitor, SNRI = serotonin-norepinephrine reuptake inhibitor, SMS = serotonin modulator and stimulator, SARI = serotonin antagonist and reuptake inhibitor, TCA = tricyclic antidepressant, TeCA = tetracyclic antidepressant, MAOI = monoamine oxidase inhibitor

**eTable 3:** List of ICD-9/10 codes used to calculate Charlson Comorbidity Index score.

| Comorbidity                                                                         | ICD-9 codes                                                                                                       | ICD-10 codes                                                                                                    |
|-------------------------------------------------------------------------------------|-------------------------------------------------------------------------------------------------------------------|-----------------------------------------------------------------------------------------------------------------|
| Myocardial infarction                                                               | 410, 412                                                                                                          | I21-I22, I25.2                                                                                                  |
| Congestive heart failure                                                            | 398.91, 402.01, 402.11, 402.91, 404.01, 404.03, 404.11, 404.13, 404.91, 404.93, 425.4-425.9, 428                  | I09.9, I11.0, I13.0, I13.2, I25.5, I42.0, I42.5-I42.9, I43, I50, P29.0                                          |
| Peripheral vascular disease                                                         | 093.0, 437.3, 440-441, 443.1-443.9, 447.1, 557.1, 557.9, V43.4                                                    | I70-I71, I73.1, I73.8, I73.9, I77.1, I79.0, I79.2, K55.1, K55.8, K55.9, Z95.8, Z95.9                            |
| Cerebrovascular disease                                                             | 362.34, 430-438                                                                                                   | G45-G46, H34.0, I60-I69                                                                                         |
| Dementia                                                                            | 290, 294.1, 331.2                                                                                                 | F00-F03, F05.1, G30, G31.1                                                                                      |
| Chronic pulmonary disease                                                           | 416.8, 416.9, 490-505, 506.4, 508.1, 508.8                                                                        | I27.8-I27.9, J40-J47, J60-J67, J68.4, J70.1, J70.3                                                              |
| Rheumatic disease                                                                   | 446.5, 710.0-710.4, 714.0-714.2, 714.8, 725                                                                       | M05-M06, M31.5, M32-M34, M35.1, M35.3, M36.0                                                                    |
| Peptic ulcer disease                                                                | 531-534                                                                                                           | K25-K28                                                                                                         |
| Mild liver disease                                                                  | 070.22-070.23, 070.32-070.33, 070.44, 070.54, 070.6, 070.9, 570-571, 573.3-573.4, 573.8-573.9, V42.7              | B18, K70.0-K70.3, K70.9, K71.3-K71.5, K71.7, K73-K74, K76.0, K76.2-K76.4, K76.8-K76.9, Z94.4                    |
| Diabetes without chronic complication                                               | 250.0-250.3, 250.8, 250.9                                                                                         | E10.0-E10.1, E10.6, E10.8-E11.1, E11.6, E11.8-E12.1, E12.6, E12.8-E13.1, E13.6, E13.8-E14.1, E14.6, E14.8-E14.9 |
| Diabetes with chronic complication                                                  | 250.4-250.7                                                                                                       | E10.2-E10.5, E10.7, E11.2-E11.5, E11.7, E12.2-E12.5, E12.7, E13.2-E13.5, E13.7, E14.2-E14.5, E14.7              |
| Hemiplegia or paraplegia                                                            | 334.1, 342-344.6, 344.9                                                                                           | G04.1, G11.4, G80.1, G80.2, G81-G83.4, G83.9                                                                    |
| Renal disease                                                                       | 403.01, 403.11, 403.91, 404.02-404.03, 404.12-404.13, 404.92-404.93, 582-583.7, 585-586, 588.0, V42.0, V45.1, V56 | I12.0, I13.1, N03.2-N03.7, N05.2-N05.7, N18-N19, N25.0, Z49.0-Z49.2, Z94.0, Z99.2                               |
| Any malignancy, including lymphoma and leukemia (except malignant neoplasm of skin) | 140-172, 174-195.8, 200-208, 238.6                                                                                | C00-C26, C30-C34, C37-C41, C43, C45-C58, C60-C76, C81-C85, C88, C90-C97                                         |
| Moderate or severe liver disease                                                    | 456.0-456.2, 572.2-572.8                                                                                          | I85.0, I85.9, I86.4, I98.2, K70.4, K71.1, K72.1, K72.9, K76.5-K76.7                                             |
| Metastatic solid tumor                                                              | 196-199                                                                                                           | C77-C80                                                                                                         |
| AIDS/HIV                                                                            | 042-044                                                                                                           | B20-B22, B24                                                                                                    |

Abbreviations: ICD-9/10 = International Classification of Diseases, Ninth/Tenth Revision

**eTable 4:** Characteristics of post-laminectomy syndrome patients in Diamond Network stratified by SCS status.

| Characteristic                       | No SCS<br>(N = 526,758) | SCS<br>(N = 26,179) | P-value |
|--------------------------------------|-------------------------|---------------------|---------|
| <b>Continuous variables</b>          | <b>Mean ± SD</b>        | <b>Mean ± SD</b>    |         |
| Age at index event (mean, SD)        | 59.77+12.72             | 61.38+12.94         | < 0.001 |
| Charlson score (mean, SD)            | 1.15+1.79               | 1.21+1.80           | < 0.001 |
| <b>Categorical variables</b>         | <b>Number (%)</b>       | <b>Number (%)</b>   |         |
| Sex (number, %)                      |                         |                     | < 0.001 |
| Female                               | 291,002 (55.24)         | 14,800 (56.53)      |         |
| Male                                 | 235,592 (44.72)         | 11,369 (43.43)      |         |
| Race (number, %)                     |                         |                     | < 0.001 |
| White                                | 176,600 (33.53)         | 8,539 (32.62)       |         |
| African American                     | 18,412 (3.50)           | 559 (2.14)          |         |
| Asian                                | 633 (0.12)              | 15 (0.06)           |         |
| Unknown                              | 331,113 (62.86)         | 17,066 (65.19)      |         |
| Psychosocial history (number, %)*    |                         |                     |         |
| Smoking                              | 122,403 (23.24)         | 6,908 (26.39)       | < 0.001 |
| Alcohol abuse                        | 11,054 (2.10)           | 496 (1.89)          | 0.023   |
| Non-alcohol substance use disorder   | 70,447 (13.37)          | 3,916 (14.96)       | < 0.001 |
| Chronic opioid use                   | 117,328 (22.27)         | 6,225 (23.78)       | < 0.001 |
| Depression diagnosis                 | 102,476 (19.45)         | 7,393 (28.24)       | < 0.001 |
| Anxiety diagnosis                    | 79,318 (15.06)          | 4,876 (18.63)       | < 0.001 |
| Psychosis diagnosis                  | 8,912 (1.69)            | 530 (2.02)          | < 0.001 |
| Current medications (number, %)*     |                         |                     |         |
| Antidepressant use                   | 125,051 (23.74)         | 7,419 (28.34)       | < 0.001 |
| Benzodiazepine use                   | 107,029 (20.32)         | 6,274 (23.97)       | < 0.001 |
| Antipsychotic use                    | 21,666 (4.11)           | 1,207 (4.61)        | < 0.001 |
| Systemic comorbidities (number, %)** |                         |                     |         |
| Myocardial infarction                | 19,621 (3.72)           | 1,274 (4.87)        | <0.001  |
| Congestive heart failure             | 31,741 (6.03)           | 1,921 (7.34)        | <0.001  |
| Peripheral vascular disease          | 48,863 (9.28)           | 3,235 (12.36)       | <0.001  |
| Cerebrovascular disease              | 46,179 (8.77)           | 2,833 (10.82)       | <0.001  |
| Dementia                             | 4,377 (0.83)            | 295 (1.13)          | <0.001  |
| Chronic pulmonary disease            | 129,155 (24.52)         | 7,599 (29.03)       | <0.001  |
| Rheumatic disease                    | 28,387 (5.39)           | 1,767 (6.75)        | <0.001  |
| Peptic ulcer disease                 | 13,404 (2.54)           | 885 (3.38)          | <0.001  |
| Liver disease                        | 33,613 (6.38)           | 2,013 (7.69)        | <0.001  |
| Diabetes                             | 121,138 (23.00)         | 7,174 (27.40)       | <0.001  |
| Hemiplegia/paraplegia                | 9,400 (1.78)            | 484 (1.85)          | 0.46    |
| Renal disease                        | 35,190 (6.68)           | 2,424 (9.26)        | <0.001  |
| Any malignancy                       | 33,010 (6.27)           | 1,888 (7.21)        | <0.001  |
| Metastatic solid tumor               | 6,359 (1.21)            | 325 (1.24)          | 0.64    |
| AIDS/HIV                             | 1,596 (0.30)            | 83 (0.32)           | 0.73    |

\*1-year prior to index date

\*\*Any time prior to index date

**eTable 5:** Propensity score matching analysis with average treatment effect (ATE) defined by odds ratios.

| Chronic opioid use definition | Prior opioid use | Before matching |        | After matching |        | OR [95% CI]          | P-value      |
|-------------------------------|------------------|-----------------|--------|----------------|--------|----------------------|--------------|
|                               |                  | #Controls       | #Cases | #Controls      | #Cases |                      |              |
| ≥4                            | No               | 358,771         | 17,335 | 173,328        | 17,334 | 0.977 [0.927, 1.029] | 0.37         |
| ≥4                            | Yes              | 113,422         | 6,013  | 60,094         | 6,013  | 0.944 [0.890, 1.001] | 0.06         |
| ≥6                            | No               | 348,403         | 16,767 | 167,636        | 16,766 | 0.923 [0.867, 0.982] | <b>0.01</b>  |
| ≥6                            | Yes              | 106,139         | 5,607  | 56,034         | 5,607  | 0.926 [0.873, 0.983] | <b>0.01</b>  |
| ≥10                           | No               | 337,491         | 16,256 | 162,539        | 16,255 | 0.874 [0.805, 0.948] | <b>0.001</b> |
| ≥10                           | Yes              | 91,465          | 4,783  | 47,780         | 4,783  | 0.925 [0.869, 0.984] | <b>0.01</b>  |

**eFigure 1: Diamond Network demographics.** Flow chart illustrating the inclusion and exclusion criteria of post-laminectomy syndrome patients with and without spinal SCS from TriNetX Diamond Network. For cases, we defined the index date as the date of SCS implantation. For controls, we randomly assigned an index date after PLS diagnosis that matches the distribution of days between PLS diagnosis and SCS placement in the case group.

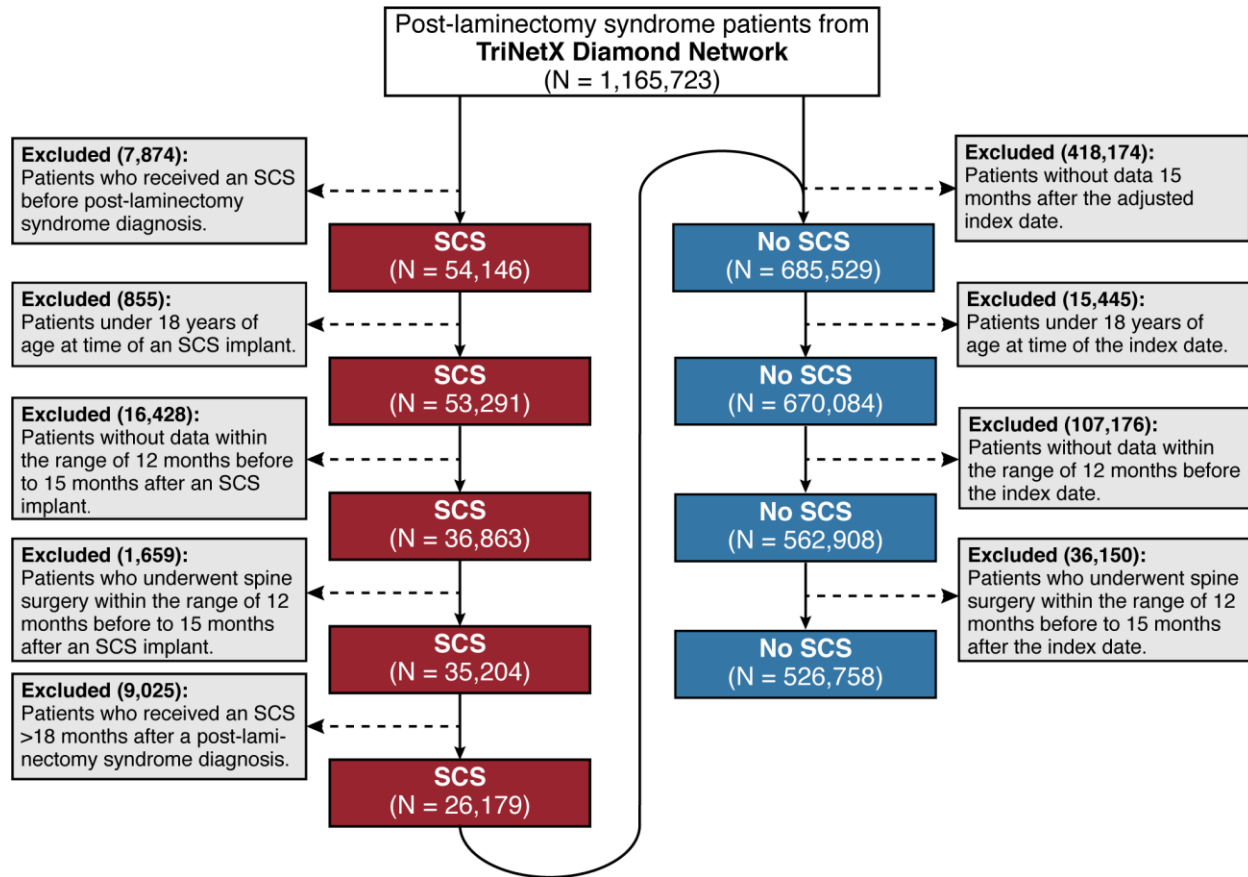

PLS- post-laminectomy syndrome; SCS- spinal cord stimulation

**eFigure 2:** Multivariable analysis showing factors associated with receiving an SCS implant in PLS patients.

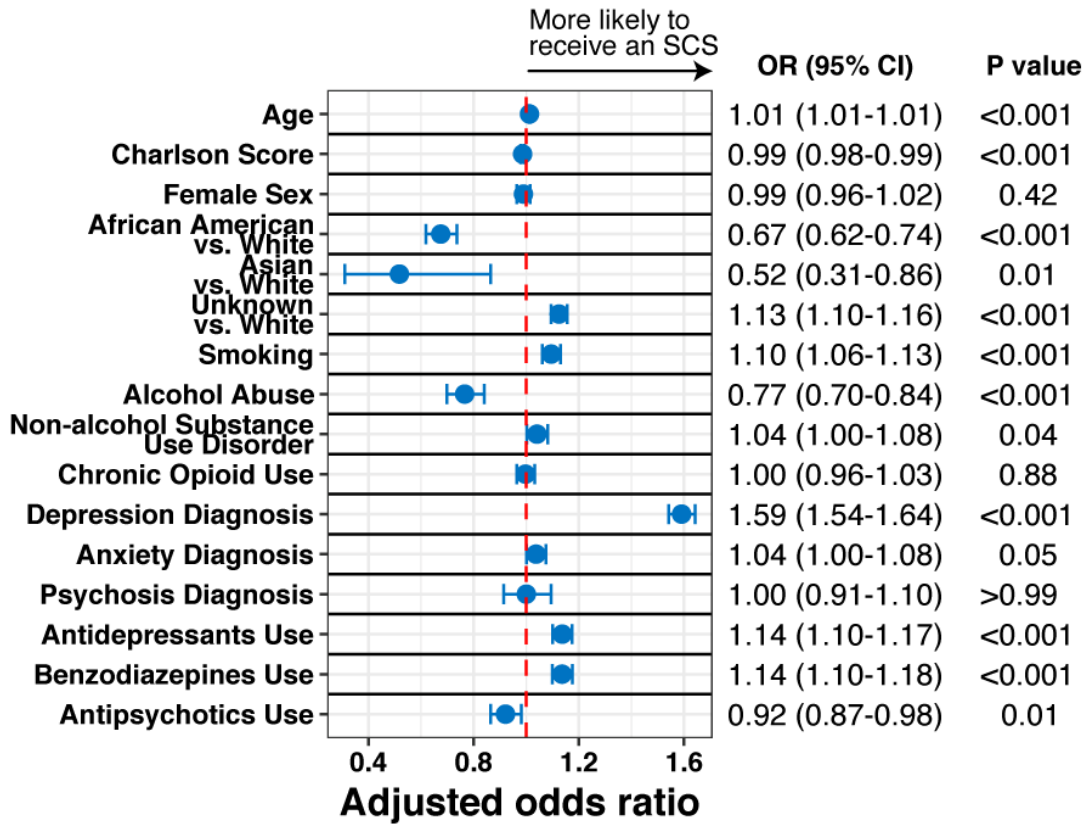

PLS- post-laminectomy syndrome; SCS- spinal cord stimulation



**eFigure 3:** Breakdown of PLS cohort by SCS status, baseline opioid status, and opioid use status at 3-15 months after adjusted index date (for patients without SCS) or SCS implant in Diamond Network. (A) Chronic opioid therapy is defined as  $\geq 4$  prescriptions/year. (B) Chronic opioid therapy is defined as  $\geq 10$  prescriptions/year.

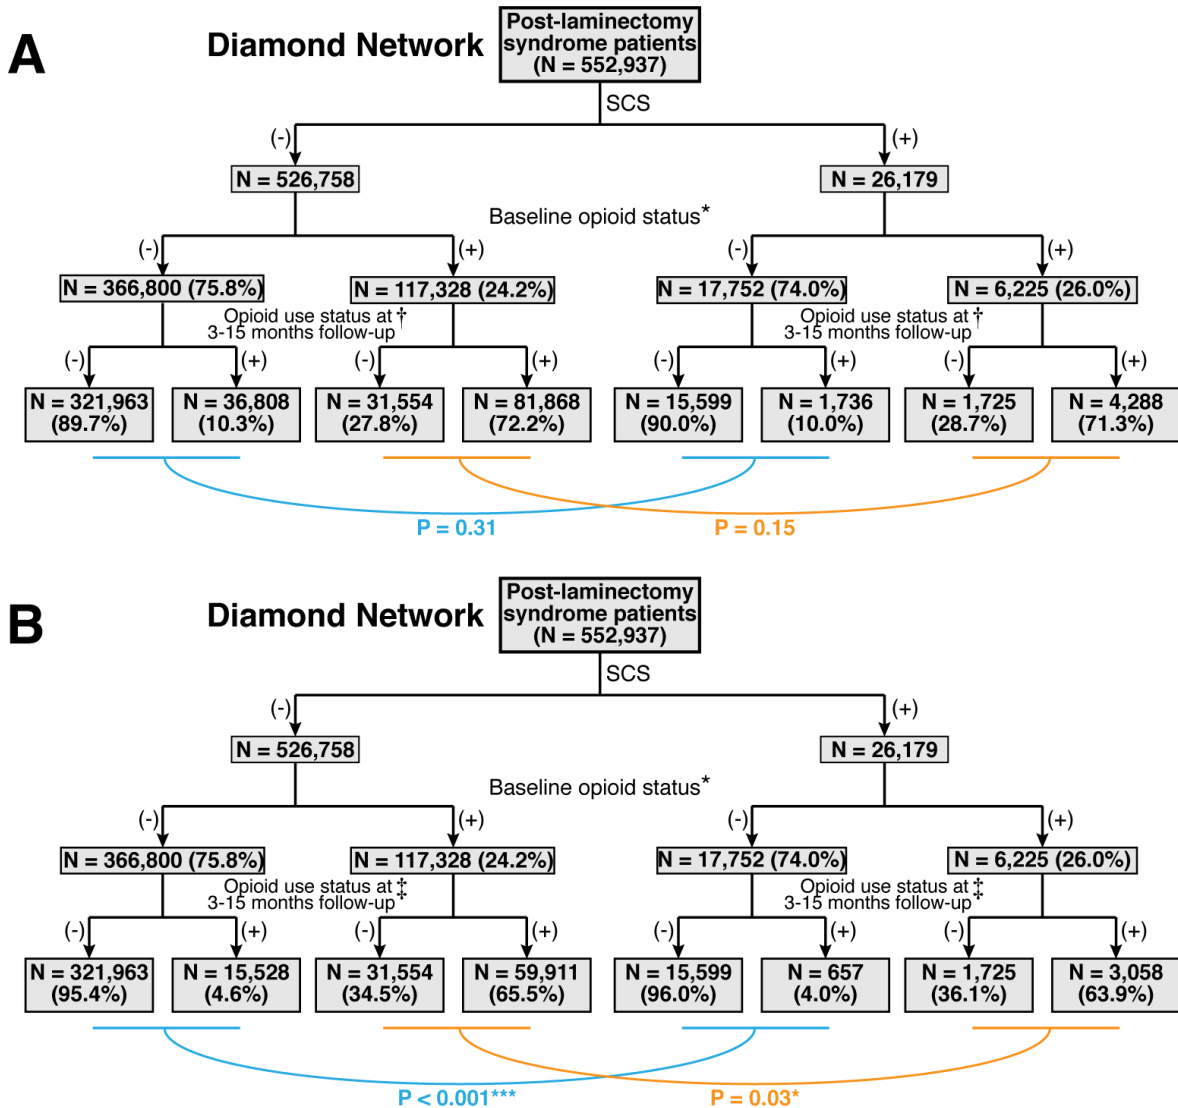

\* Baseline opioid status: (+) is defined as  $\geq 6$  prescriptions/year and (-) is defined as  $\leq 2$  prescriptions/year.

† Opioid use status: (+) is defined as  $\geq 4$  prescriptions/year and (-) is defined as  $\leq 2$  prescriptions/year.

‡ Opioid use status: (+) is defined as  $\geq 10$  prescriptions/year and (-) is defined as  $\leq 2$  prescriptions/year.

PLS- post-laminectomy syndrome; SCS- spinal cord stimulation

**eFigure 4:** Multivariable analysis with sensitivity analyses showing factors associated with new COT in opioid-naïve patients (left panel) and persistent COT in chronic opioid users (right panel) 3-15 months after adjusted index date (for patients without SCS) or SCS implant in Diamond Network. Chronic opioid use is defined as  $\geq 4$ ,  $\geq 6$ , or  $\geq 10$  prescriptions/year, while opioid-naïve is defined as  $\leq 2$  prescriptions/year.

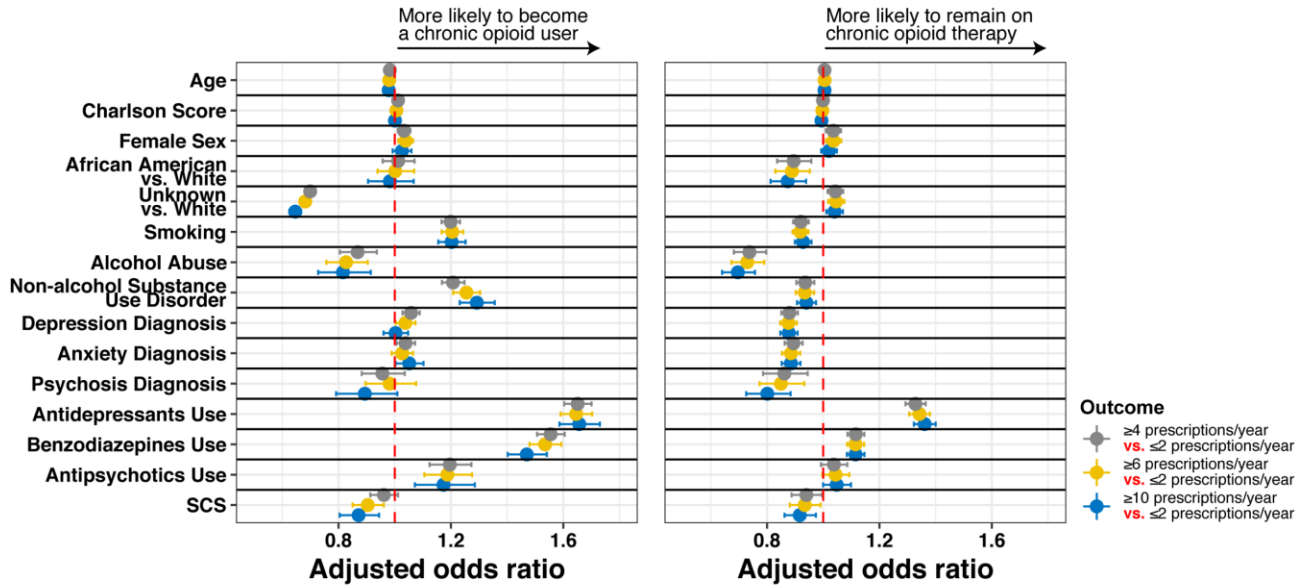

COT- chronic opioid therapy; SCS- spinal cord stimulation
